# Supplementary material for: Unprecedented radioactive pollution in Spitsbergen air – first data as of 21st century
Source: Copernicus journal article supplement (doi:10.5194/egusphere-2025-1573), 2025-05-13
Supplement: Supplementary file 1 [file egusphere-2025-1573-supplement.pdf]

# Unprecedented radioactive pollution in Spitsbergen air - first data as of 21st century - supplementary material

Anna Cwanek<sup>1</sup>, Agnieszka Burakowska<sup>2</sup>, Ewa Nalichowska<sup>1</sup>, Magdalena Długosz-Lisiecka<sup>3</sup>, Marek Kubicki<sup>4</sup>, Tomasz Wawrzyniak<sup>4</sup>, Edyta Łokas<sup>1</sup>, Michał Gryziński<sup>2</sup>, Kamil Brudecki<sup>1</sup>

<sup>1</sup>Institute of Nuclear Physics, Polish Academy of Sciences, 31-342 Kraków, Poland

<sup>2</sup>National Centre for Nuclear Research, 05-400 Otwock-Świerk, Poland

<sup>3</sup>Lodz University of Technology, Institute of Applied Radiation Chemistry, 90-924 Łódź, Poland

<sup>4</sup>Institute of Geophysics, Polish Academy of Science, 01-452 Warszawa, Poland

*Correspondence to:* Anna Cwanek (anna.cwanek@ifj.edu.pl)

**Table S1: Meteorological parameters characteristics.**

| Variable                             | Location                          | Sensor                                                                                                                 | Height                   | Start operation | Unit         |
|--------------------------------------|-----------------------------------|------------------------------------------------------------------------------------------------------------------------|--------------------------|-----------------|--------------|
| <b>Air temperature</b>               | 77°00'1.261" N<br>15°32'12.267" E | Traditional thermometer in a Stevenson screen,<br>Vaisala HMP 45D (since January 2001),<br>HMP155 (since January 2018) | 2 m a.g.l.               | 1979            | °C           |
| <b>Relative humidity</b>             | 77°00'1.261" N<br>15°32'12.267" E | Hygrometer,<br>HMP45D (since January 2001),<br>HMP155 (since January 2018)                                             | 2 m a.g.l.               | 1979            | %            |
| <b>Precipitation</b>                 | 77°00'5.734" N<br>15°32'17.077" E | Hellmann rain gauge D-200                                                                                              | 1 m a.g.l.               | 1979            | mm           |
| <b>Atmospheric pressure</b>          | 77°00'1.261" N<br>15°32'12.267" E | Mercury barometer, PTB200A (since January 2001),<br>Baro-1QML-AV (since January 2018)                                  | Reduced to the sea level | 1979            | hPa          |
| <b>Wind speed and wind direction</b> | 77°00'1.261" N<br>15°32'12.267" E | Fuess 90z wind meter,<br>VaisalaWAA151 (since January 2001),<br>Vaisala WMT702 (since January 2018)                    | 10 m a.g.l.              | 1983            | m/s          |
| <b>Sunshine duration</b>             | 77°00'5.935" N<br>15°32'14.3" E   | Campbell–Stokes heliograph                                                                                             | 2 m a.g.l.               | 1979            | h            |
| <b>Cloudiness</b>                    | On location                       | Visual observations                                                                                                    | -                        | 1983            | octas        |
| <b>Visibility</b>                    | On location                       | Visual observations                                                                                                    | -                        | 1983            | marine scale |

**Table S2: Results of quality assurance for blank samples.**

| Code                | <sup>238</sup> Pu (Bq) | <sup>239+240</sup> Pu (Bq) | <sup>241</sup> Am (Bq) |
|---------------------|------------------------|----------------------------|------------------------|
| <b>blank1</b>       | < 0.000063             | < 0.000068                 | < 0.000076             |
| <b>blank2</b>       | < 0.000043             | < 0.000040                 | < 0.00016              |
| <b>blank3</b>       | < 0.000039             | < 0.000034                 | < 0.00015              |
| <b>blank filter</b> | < 0.00021              | < 0.00012                  | < 0.00014              |

**Table S3: Results of quality assurance for reference materials (95% confidence intervals in error assessment).**

| Reference material | <sup>238</sup> Pu (Bq/kg) |                   | <sup>239+240</sup> Pu (Bq/kg) |                   | <sup>241</sup> Am (Bq/kg) |                   |
|--------------------|---------------------------|-------------------|-------------------------------|-------------------|---------------------------|-------------------|
|                    | <b>certified</b>          | <b>calculated</b> | <b>certified</b>              | <b>calculated</b> | <b>certified</b>          | <b>calculated</b> |
| <b>IAEA-447</b>    | 0.150 ± 0.020             | 0.148 ± 0.052     | 5.30 ± 0.40                   | 5.27 ± 0.31       | 2.30 ± 0.40               | 1.89 ± 0.13       |
| <b>IAEA-385</b>    | 0.392 ± 0.021             | 0.440 ± 0.044     | 2.98 ± 0.26                   | 3.50 ± 0.18       | 4.42 ± 0.23               | 4.59 ± 0.36       |

**Table S4: Meteorological parameters in quarters used in correlation assessment.**

| year | quarter | Air temperature (°C) | Sum of precipitation (mm) | Relative humidity (%) | Cloudiness (octas) | Sunshine duration (h) | Visibility (a.u.) | Atmospheric pressure (hPa) | N (m/s) | NE (m/s) | E (m/s) | SE (m/s) | S (m/s) | SW (m/s) | W (m/s) | NW (m/s) |
|------|---------|----------------------|---------------------------|-----------------------|--------------------|-----------------------|-------------------|----------------------------|---------|----------|---------|----------|---------|----------|---------|----------|
| 2007 | 1       | -6.78                | 87.50                     | 75.79                 | 5.31               | 71.10                 | 6.99              | 1001.03                    | 0.00    | 1.04     | 3.81    | 0.58     | 0.47    | 0.33     | 0.06    | 0.05     |
| 2007 | 2       | -2.70                | 48.30                     | 78.23                 | 6.22               | 543.70                | 7.34              | 1009.81                    | 0.00    | 0.42     | 3.96    | 0.75     | 0.14    | 0.33     | 0.13    | 0.13     |
| 2007 | 3       | 3.38                 | 130.80                    | 85.50                 | 6.51               | 382.60                | 7.85              | 1008.08                    | 0.00    | 0.34     | 2.58    | 0.55     | 0.37    | 0.22     | 0.29    | 0.11     |
| 2007 | 4       | -3.27                | 165.10                    | 78.62                 | 6.20               | 28.70                 | 7.23              | 999.49                     | 0.00    | 1.26     | 2.49    | 0.78     | 0.38    | 0.54     | 0.61    | 0.33     |
| 2008 | 1       | -8.49                | 77.10                     | 77.18                 | 5.35               | 149.80                | 7.39              | 1001.15                    | 0.00    | 0.71     | 4.88    | 0.32     | 0.39    | 0.35     | 0.33    | 0.16     |
| 2008 | 2       | -2.82                | 56.50                     | 78.17                 | 5.47               | 709.40                | 7.88              | 1017.36                    | 0.00    | 0.33     | 2.89    | 0.34     | 0.32    | 0.48     | 0.14    | 0.43     |
| 2008 | 3       | 3.69                 | 226.20                    | 88.21                 | 6.62               | 369.10                | 6.93              | 1010.78                    | 0.00    | 0.21     | 1.16    | 0.64     | 0.62    | 0.57     | 0.21    | 0.26     |
| 2008 | 4       | -5.26                | 80.10                     | 78.75                 | 5.47               | 19.80                 | 7.35              | 1001.67                    | 0.00    | 0.93     | 3.29    | 0.54     | 0.31    | 0.42     | 0.46    | 0.13     |
| 2009 | 1       | -9.28                | 89.60                     | 78.65                 | 5.69               | 66.00                 | 7.03              | 1005.44                    | 0.00    | 0.49     | 5.41    | 0.53     | 0.24    | 0.11     | 0.14    | 0.19     |
| 2009 | 2       | -3.27                | 71.90                     | 79.69                 | 5.52               | 630.10                | 7.79              | 1013.26                    | 0.00    | 0.02     | 2.80    | 0.54     | 0.25    | 0.39     | 0.48    | 0.34     |
| 2009 | 3       | 3.85                 | 89.80                     | 83.43                 | 6.42               | 468.50                | 7.67              | 1009.05                    | 0.00    | 0.24     | 3.09    | 1.09     | 0.19    | 0.13     | 0.23    | 0.05     |
| 2009 | 4       | -2.15                | 228.40                    | 82.94                 | 6.57               | 34.90                 | 7.14              | 1007.94                    | 0.00    | 1.38     | 3.11    | 0.43     | 0.32    | 0.21     | 0.35    | 0.19     |
| 2010 | 1       | -8.80                | 119.70                    | 77.72                 | 5.30               | 186.40                | 7.00              | 1011.58                    | 0.00    | 1.17     | 3.79    | 0.46     | 0.40    | 0.48     | 0.24    | 0.19     |
| 2010 | 2       | -1.77                | 65.80                     | 83.03                 | 6.51               | 488.90                | 7.57              | 1014.18                    | 0.00    | 0.64     | 3.85    | 0.68     | 0.42    | 0.16     | 0.18    | 0.00     |
| 2010 | 3       | 3.32                 | 151.80                    | 87.20                 | 6.51               | 376.40                | 7.47              | 1012.12                    | 0.00    | 0.06     | 2.12    | 0.47     | 0.56    | 0.60     | 0.17    | 0.04     |
| 2010 | 4       | -6.59                | 111.20                    | 76.90                 | 5.27               | 14.50                 | 7.64              | 1009.20                    | 0.00    | 1.27     | 3.13    | 0.53     | 0.28    | 0.35     | 0.11    | 0.00     |
| 2011 | 1       | -10.62               | 139.10                    | 79.48                 | 5.30               | 115.40                | 7.65              | 1002.26                    | 0.00    | 0.47     | 4.56    | 0.58     | 0.16    | 0.51     | 0.30    | 0.00     |
| 2011 | 2       | -0.72                | 74.70                     | 82.05                 | 5.71               | 621.10                | 7.83              | 1010.62                    | 0.00    | 0.50     | 2.52    | 0.57     | 0.43    | 0.38     | 0.38    | 0.06     |
| 2011 | 3       | 4.06                 | 207.80                    | 88.60                 | 6.92               | 258.10                | 7.11              | 1010.55                    | 0.00    | 0.14     | 3.44    | 0.47     | 0.41    | 0.33     | 0.33    | 0.00     |
| 2011 | 4       | -3.09                | 195.70                    | 79.07                 | 6.02               | 42.20                 | 7.07              | 996.87                     | 0.05    | 1.40     | 3.00    | 0.53     | 0.28    | 0.23     | 0.29    | 0.19     |
| 2012 | 1       | -2.97                | 172.50                    | 81.35                 | 6.28               | 90.30                 | 6.92              | 1002.71                    | 0.00    | 0.61     | 3.54    | 0.72     | 0.26    | 0.40     | 0.86    | 0.00     |
| 2012 | 2       | -2.53                | 39.90                     | 77.41                 | 5.75               | 579.40                | 7.59              | 1011.17                    | 0.00    | 1.17     | 2.39    | 0.42     | 0.21    | 0.40     | 0.30    | 0.11     |
| 2012 | 3       | 4.08                 | 280.60                    | 83.65                 | 6.65               | 276.10                | 7.52              | 1005.71                    | 0.00    | 0.03     | 2.82    | 0.65     | 0.36    | 0.30     | 0.31    | 0.19     |
| 2012 | 4       | -3.07                | 68.80                     | 75.64                 | 5.26               | 34.20                 | 7.58              | 1010.13                    | 0.00    | 1.47     | 2.96    | 0.34     | 0.43    | 0.23     | 0.26    | 0.00     |
| 2013 | 1       | -9.49                | 61.30                     | 71.26                 | 4.43               | 121.00                | 7.68              | 1013.27                    | 0.00    | 1.20     | 4.06    | 0.40     | 0.22    | 0.27     | 0.26    | 0.13     |
| 2013 | 2       | -2.44                | 76.80                     | 81.16                 | 5.81               | 474.90                | 7.56              | 1011.46                    | 0.00    | 0.37     | 3.07    | 0.50     | 0.28    | 0.60     | 0.33    | 0.14     |
| 2013 | 3       | 5.44                 | 321.40                    | 86.22                 | 6.68               | 327.00                | 7.43              | 1008.64                    | 0.00    | 0.14     | 2.96    | 0.60     | 0.18    | 0.38     | 0.41    | 0.06     |
| 2013 | 4       | -4.91                | 86.30                     | 73.33                 | 5.36               | 25.70                 | 7.38              | 998.76                     | 0.00    | 1.48     | 3.10    | 0.51     | 0.20    | 0.28     | 0.43    | 0.22     |

|             |   |        |        |       |      |        |      |         |      |      |      |      |      |      |      |      |
|-------------|---|--------|--------|-------|------|--------|------|---------|------|------|------|------|------|------|------|------|
| <b>2014</b> | 1 | -3.64  | 93.60  | 78.71 | 5.97 | 127.20 | 7.39 | 1006.77 | 0.00 | 0.55 | 3.84 | 0.60 | 0.25 | 0.28 | 0.43 | 0.07 |
| <b>2014</b> | 2 | -1.96  | 56.50  | 76.39 | 6.12 | 566.60 | 7.84 | 1012.80 | 0.00 | 0.47 | 1.68 | 0.57 | 0.28 | 0.31 | 0.61 | 0.22 |
| <b>2014</b> | 3 | 4.33   | 151.50 | 82.19 | 6.43 | 437.00 | 7.48 | 1010.84 | 0.00 | 0.04 | 1.70 | 0.41 | 0.65 | 0.42 | 0.49 | 0.41 |
| <b>2014</b> | 4 | -4.10  | 111.90 | 78.36 | 5.85 | 13.70  | 6.89 | 1005.38 | 0.00 | 0.97 | 3.19 | 0.49 | 0.26 | 0.30 | 0.62 | 0.16 |
| <b>2015</b> | 1 | -7.34  | 107.20 | 78.79 | 5.66 | 78.40  | 6.49 | 998.53  | 0.00 | 0.59 | 5.09 | 0.30 | 0.39 | 0.27 | 0.49 | 0.18 |
| <b>2015</b> | 2 | -1.41  | 30.20  | 81.13 | 6.27 | 547.10 | 7.54 | 1008.03 | 0.00 | 0.50 | 2.93 | 0.61 | 0.26 | 0.30 | 0.10 | 0.00 |
| <b>2015</b> | 3 | 4.34   | 251.60 | 85.21 | 6.30 | 420.00 | 7.62 | 1013.86 | 0.00 | 0.05 | 2.54 | 0.70 | 0.55 | 0.13 | 0.35 | 0.12 |
| <b>2015</b> | 4 | -2.45  | 178.00 | 80.22 | 5.82 | 13.70  | 7.01 | 997.30  | 0.00 | 0.60 | 2.86 | 0.68 | 0.61 | 0.26 | 0.40 | 0.11 |
| <b>2016</b> | 1 | -3.91  | 104.20 | 78.17 | 5.65 | 132.80 | 6.92 | 1003.05 | 0.01 | 0.99 | 3.23 | 0.61 | 0.31 | 0.55 | 0.11 | 0.05 |
| <b>2016</b> | 2 | -0.03  | 50.60  | 80.95 | 6.20 | 432.10 | 7.67 | 1013.49 | 0.00 | 0.03 | 3.13 | 0.51 | 0.32 | 0.33 | 0.43 | 0.12 |
| <b>2016</b> | 3 | 5.07   | 241.80 | 85.92 | 6.74 | 354.30 | 7.29 | 1008.25 | 0.00 | 0.09 | 2.34 | 0.62 | 0.41 | 0.50 | 0.42 | 0.21 |
| <b>2016</b> | 4 | 0.02   | 410.10 | 81.34 | 6.44 | 1.40   | 6.44 | 1006.74 | 0.00 | 0.36 | 2.67 | 0.29 | 0.37 | 0.53 | 1.17 | 0.12 |
| <b>2017</b> | 1 | -7.61  | 142.00 | 75.14 | 5.52 | 97.40  | 7.13 | 1000.40 | 0.00 | 0.81 | 2.43 | 0.63 | 0.28 | 0.28 | 0.88 | 0.24 |
| <b>2017</b> | 2 | -2.62  | 49.10  | 78.17 | 5.54 | 657.80 | 8.21 | 1015.19 | 0.00 | 0.12 | 2.86 | 0.54 | 0.36 | 0.11 | 0.56 | 0.12 |
| <b>2017</b> | 3 | 5.13   | 223.80 | 86.60 | 6.72 | 327.30 | 7.33 | 1011.43 | 0.00 | 0.01 | 2.58 | 0.53 | 0.31 | 0.52 | 0.77 | 0.00 |
| <b>2017</b> | 4 | -1.55  | 142.30 | 74.46 | 5.96 | 19.60  | 7.06 | 1003.29 | 0.00 | 1.96 | 3.99 | 0.24 | 0.05 | 0.16 | 0.21 | 0.00 |
| <b>2018</b> | 1 | -6.36  | 91.70  | 72.98 | 5.05 | 171.60 | 7.39 | 1013.21 | 0.00 | 0.50 | 4.19 | 0.27 | 0.33 | 0.26 | 0.35 | 0.00 |
| <b>2018</b> | 2 | -1.02  | 163.80 | 79.63 | 6.15 | 497.20 | 7.78 | 1008.66 | 0.00 | 0.01 | 2.38 | 0.58 | 0.82 | 0.70 | 0.33 | 0.26 |
| <b>2018</b> | 3 | 4.05   | 286.90 | 86.62 | 6.84 | 279.00 | 7.20 | 1006.39 | 0.00 | 0.25 | 2.29 | 0.30 | 0.56 | 0.57 | 0.57 | 0.21 |
| <b>2018</b> | 4 | -2.26  | 227.80 | 77.40 | 6.17 | 42.00  | 7.41 | 1003.14 | 0.00 | 0.90 | 2.56 | 0.52 | 0.46 | 0.39 | 0.62 | 0.12 |
| <b>2019</b> | 1 | -8.96  | 32.40  | 70.18 | 5.30 | 90.50  | 7.49 | 1001.67 | 0.00 | 1.58 | 4.04 | 0.38 | 0.33 | 0.06 | 0.29 | 0.08 |
| <b>2019</b> | 2 | -0.42  | 59.20  | 76.42 | 6.13 | 598.30 | 7.87 | 1015.35 | 0.00 | 0.46 | 2.04 | 0.48 | 0.24 | 0.58 | 0.78 | 0.62 |
| <b>2019</b> | 3 | 4.22   | 116.10 | 84.99 | 6.34 | 354.30 | 7.67 | 1011.94 | 0.00 | 0.32 | 2.21 | 1.02 | 0.48 | 0.16 | 0.30 | 0.08 |
| <b>2019</b> | 4 | -5.84  | 56.80  | 75.65 | 4.98 | 28.70  | 7.54 | 1008.33 | 0.00 | 1.72 | 3.11 | 0.27 | 0.20 | 0.24 | 0.04 | 0.08 |
| <b>2020</b> | 1 | -12.81 | 40.10  | 71.55 | 4.27 | 132.30 | 7.51 | 994.36  | 0.00 | 0.91 | 3.72 | 0.59 | 0.34 | 0.43 | 0.21 | 0.21 |
| <b>2020</b> | 2 | -1.72  | 67.40  | 81.20 | 6.12 | 461.40 | 7.72 | 1009.72 | 0.00 | 0.12 | 2.61 | 0.74 | 0.70 | 0.35 | 0.78 | 0.39 |
| <b>2020</b> | 3 | 4.81   | 231.30 | 88.92 | 6.46 | 348.10 | 7.59 | 1004.88 | 0.00 | 0.10 | 3.40 | 0.63 | 0.39 | 0.34 | 0.17 | 0.00 |
| <b>2020</b> | 4 | -2.34  | 183.20 | 78.69 | 5.55 | 26.70  | 7.76 | 1007.07 | 0.00 | 1.16 | 3.50 | 0.56 | 0.25 | 0.20 | 0.58 | 0.11 |
| <b>2021</b> | 1 | -6.36  | 107.70 | 76.72 | 5.29 | 79.10  | 7.60 | 1010.40 | 0.00 | 0.88 | 3.64 | 0.90 | 0.20 | 0.35 | 0.38 | 0.20 |
| <b>2021</b> | 2 | -1.83  | 57.70  | 78.72 | 5.89 | 572.70 | 7.73 | 1009.64 | 0.00 | 0.70 | 2.16 | 0.46 | 0.22 | 0.68 | 0.74 | 0.23 |
| <b>2021</b> | 3 | 4.27   | 201.20 | 91.69 | 6.67 | 308.50 | 7.38 | 1008.19 | 0.00 | 0.00 | 2.52 | 0.64 | 0.53 | 0.44 | 0.44 | 0.00 |
| <b>2021</b> | 4 | -4.54  | 49.30  | 73.32 | 5.43 | 17.30  | 7.27 | 1008.67 | 0.00 | 1.59 | 3.81 | 0.25 | 0.24 | 0.24 | 0.20 | 0.13 |

**Table S5: Activity concentrations of radionuclides and suspended particulate matter (SPM) concentrations in quarters used in correlation assessment.**

| year | quarter | SPM<br>( $\mu\text{g}/\text{m}^3$ ) | $^7\text{Be}$<br>(Bq/kg) | $^{137}\text{Cs}$<br>(Bq/kg) | $^{210}\text{Pb}$<br>(Bq/kg) | $^{239+240}\text{Pu}$<br>(Bq/kg) | $^{238}\text{Pu}$<br>(Bq/kg) | $^{241}\text{Am}$<br>(Bq/kg) |
|------|---------|-------------------------------------|--------------------------|------------------------------|------------------------------|----------------------------------|------------------------------|------------------------------|
| 2007 | 1       | 6.86                                | 2092.60                  | 0.49                         | 290.60                       | 0.56                             | 0.39                         | 9.61                         |
| 2007 | 2       | 4.75                                | 2254.98                  | -                            | 224.03                       | 0.55                             | 0.04                         | 37.43                        |
| 2007 | 3       | 3.75                                | 970.43                   | 0.36                         | 79.61                        | 0.63                             | 0.17                         | 8.99                         |
| 2007 | 4       | 12.40                               | 1397.65                  | 0.38                         | 275.79                       | 0.85                             | 0.20                         | 13.67                        |
| 2008 | 1       | 9.46                                | 2614.72                  | 0.30                         | 448.23                       | 0.64                             | 0.03                         | 16.03                        |
| 2008 | 2       | 4.30                                | 2885.33                  | 0.25                         | 358.31                       | 0.84                             | 0.11                         | 11.96                        |
| 2008 | 3       | 7.88                                | 1100.93                  | 0.19                         | 79.60                        | 0.45                             | 0.05                         | 8.01                         |
| 2008 | 4       | 16.07                               | 1655.87                  | 0.27                         | 186.11                       | 2.27                             | 0.43                         | 11.37                        |
| 2009 | 1       | 8.08                                | 3097.29                  | 0.26                         | 479.99                       | 0.86                             | 0.34                         | 24.18                        |
| 2009 | 2       | 3.14                                | 3389.85                  | 0.21                         | 399.13                       | 0.54                             | 0.29                         | 73.72                        |
| 2009 | 3       | 7.59                                | 1594.00                  | 0.37                         | 93.28                        | 2.11                             | 2.04                         | 13.68                        |
| 2009 | 4       | 11.13                               | 3155.70                  | 0.37                         | 254.12                       | 0.62                             | 0.81                         | 21.02                        |
| 2010 | 1       | 8.41                                | 2800.51                  | 0.35                         | 524.72                       | 0.96                             | 0.32                         | 35.04                        |
| 2010 | 2       | 4.32                                | 1772.40                  | 0.44                         | 144.70                       | 1.18                             | 0.49                         | 19.57                        |
| 2010 | 3       | 5.82                                | 1282.44                  | 0.25                         | 139.40                       | 0.81                             | 0.08                         | 41.44                        |
| 2010 | 4       | 11.21                               | 2518.43                  | 0.29                         | 432.70                       | -                                | 0.31                         | -                            |
| 2011 | 1       | 9.11                                | 3082.54                  | 0.32                         | 464.99                       | -                                | -                            | -                            |
| 2011 | 2       | 7.77                                | 3027.80                  | 0.48                         | 192.55                       | -                                | -                            | -                            |
| 2011 | 3       | 3.65                                | -                        | 0.57                         | 81.04                        | -                                | -                            | -                            |
| 2012 | 3       | 7.97                                | -                        | 0.26                         | 46.76                        | -                                | -                            | -                            |
| 2012 | 4       | 7.14                                | 922.21                   | 0.23                         | 131.42                       | -                                | -                            | -                            |
| 2013 | 1       | 5.40                                | 2613.09                  | 0.30                         | 516.92                       | -                                | -                            | -                            |
| 2013 | 2       | 6.52                                | 1154.99                  | -                            | 115.75                       | -                                | -                            | -                            |
| 2013 | 3       | 8.33                                | 1739.72                  | 0.62                         | 105.21                       | -                                | -                            | -                            |
| 2013 | 4       | 7.97                                | 1715.32                  | -                            | 282.60                       | -                                | -                            | -                            |
| 2014 | 1       | 7.36                                | 2042.56                  | 0.78                         | 240.69                       | 0.23                             | 0.08                         | 17.00                        |
| 2014 | 2       | 4.82                                | 1996.95                  | 0.54                         | 202.66                       | 0.29                             | 0.02                         | 13.24                        |
| 2014 | 3       | 8.41                                | 1704.00                  | -                            | 102.39                       | 0.72                             | 0.09                         | 11.27                        |
| 2014 | 4       | 7.60                                | 2165.69                  | -                            | 312.11                       | 0.84                             | 0.15                         | 5.03                         |

|             |   |       |         |      |        |      |      |       |
|-------------|---|-------|---------|------|--------|------|------|-------|
| <b>2015</b> | 1 | 15.32 | 2582.53 | -    | 472.00 | 0.70 | 0.03 | 9.36  |
| <b>2015</b> | 2 | 5.79  | 2229.30 | -    | 251.88 | 0.35 | 0.04 | 12.32 |
| <b>2015</b> | 3 | 3.80  | 1249.22 | -    | 117.68 | -    | -    | 38.12 |
| <b>2015</b> | 4 | 11.94 | 1477.26 | 0.44 | 205.09 | 1.51 | 0.03 | 81.54 |
| <b>2016</b> | 1 | 10.41 | 1990.43 | 0.55 | 310.61 | 0.86 | 0.06 | -     |
| <b>2016</b> | 2 | 7.07  | 1433.78 | -    | 105.59 | 0.66 | 0.10 | 90.96 |
| <b>2016</b> | 3 | 10.00 | 1449.87 | -    | 93.89  | 0.47 | 0.05 | 18.29 |
| <b>2016</b> | 4 | 15.87 | 1534.01 | -    | 232.81 | 0.84 | 0.14 | 7.33  |
| <b>2017</b> | 1 | 5.93  | 1962.82 | -    | 364.99 | 0.27 | 0.05 | 12.61 |
| <b>2017</b> | 2 | 4.33  | 2354.54 | -    | 282.05 | 0.47 | 0.13 | 18.67 |
| <b>2017</b> | 3 | 4.62  | 991.90  | -    | 100.92 | 0.38 | -    | 4.85  |
| <b>2017</b> | 4 | 7.77  | 1567.15 | -    | 161.76 | 1.13 | 1.82 | 10.42 |
| <b>2018</b> | 1 | 11.45 | 2205.41 | -    | 359.75 | 0.35 | 1.20 | 14.85 |
| <b>2018</b> | 2 | 10.20 | 1656.99 | -    | 179.04 | 0.32 | 0.69 | 34.10 |
| <b>2018</b> | 3 | 10.18 | 1051.68 | 0.17 | 81.86  | 1.65 | 0.29 | 86.74 |
| <b>2018</b> | 4 | 12.41 | 1247.86 | -    | 159.19 | 0.91 | -    | -     |
| <b>2019</b> | 1 | 5.91  | 2407.05 | -    | 494.42 | 0.77 | -    | -     |
| <b>2019</b> | 2 | 5.73  | 2023.55 | -    | 194.05 | 0.51 | 0.22 | 40.44 |
| <b>2019</b> | 3 | 4.90  | 1154.00 | -    | 100.46 | 0.78 | 0.05 | 25.53 |
| <b>2019</b> | 4 | 10.26 | 1900.83 | 0.55 | 255.57 | -    | 0.39 | 22.40 |
| <b>2020</b> | 1 | 10.74 | 2419.59 | 0.63 | 593.17 | -    | 0.75 | 15.07 |
| <b>2020</b> | 2 | 10.45 | 2789.05 | -    | 202.10 | 0.80 | 0.32 | 13.12 |
| <b>2020</b> | 3 | 4.98  | 1302.47 | 0.11 | 90.09  | 0.90 | -    | 10.45 |
| <b>2020</b> | 4 | 10.97 | 1550.83 | 0.07 | 162.02 | 1.43 | 0.21 | 18.03 |
| <b>2021</b> | 1 | 6.74  | 2549.31 | -    | 307.59 | 0.44 | 0.17 | 2.55  |
| <b>2021</b> | 2 | 6.51  | 2564.23 | -    | 161.97 | 0.43 | 0.09 | 8.54  |
| <b>2021</b> | 3 | 8.36  | -       | 0.20 | 66.92  | 0.34 | 0.13 | 4.48  |
| <b>2021</b> | 4 | 12.68 | 2507.91 | -    | 331.23 | -    | 0.35 | 11.47 |

**Table S6: Reference signatures (activity ratios) of selected past nuclear events.**

| Activity ratio                           | Global fallout <sup>1</sup><br>(+ SNAP 9A) | Chernobyl <sup>2</sup><br>(NPP) | Fukushima <sup>3</sup><br>(NPP) | Thule <sup>4</sup><br>(Weapon grade) | Cap la Hague <sup>5</sup><br>(NRP) | Sellafield <sup>5</sup><br>(NRP) | Mayak <sup>5</sup><br>(PPP) | Stepovogo Fjord <sup>5</sup><br>(Sunken submarine<br>reactor) | Abrosimov Fjord <sup>5</sup><br>(Sunken submarine<br>reactor) |
|------------------------------------------|--------------------------------------------|---------------------------------|---------------------------------|--------------------------------------|------------------------------------|----------------------------------|-----------------------------|---------------------------------------------------------------|---------------------------------------------------------------|
| <sup>238</sup> Pu/ <sup>239+240</sup> Pu | 0.028 <sup>a</sup>                         | 0.38 <sup>a</sup>               | 1.2 <sup>b</sup>                | 0.0161 ± 0.0005 <sup>c</sup>         | 0.36 <sup>d</sup>                  | 0.19 <sup>d</sup>                | 0.005–0.018 <sup>d</sup>    | 0.12 <sup>d</sup>                                             | 0.45 <sup>d</sup>                                             |
| <sup>241</sup> Am/ <sup>239+240</sup> Pu | 0.38 <sup>a</sup>                          | 2.0 <sup>a</sup>                | -                               | 0.169 ± 0.005 <sup>c</sup>           | -                                  | -                                | -                           | -                                                             | -                                                             |

<sup>1</sup>(UNSCEAR, 2000)

<sup>2</sup>(Salminen et al., 2005)

<sup>3</sup>(Hirose and Povinec, 2015)

<sup>4</sup>(Eriksson et al., 2008)

<sup>5</sup>(Oughton et al., 2001)

<sup>a</sup>decay corrected to 2013

<sup>b</sup>decay corrected to 2011

<sup>c</sup>decay corrected to 2001

<sup>d</sup>reference date specified elsewhere (Oughton et al., 2001)

Eriksson, M., Lindahl, P., Roos, P., Dahlgard, H., and Holm, E.: U, Pu, and Am nuclear signatures of the Thule hydrogen bomb debris, *Environ Sci Technol*, 42, 4717–4722, <https://doi.org/10.1021/es800203f>, 2008.

Hirose, K. and Povinec, P. P.: Sources of plutonium in the atmosphere and stratosphere-troposphere mixing, *Sci Rep*, 5, 1–9, <https://doi.org/10.1038/srep15707>, 2015.

Oughton, D., Day, P., and Fifield, K.: Plutonium measurement using accelerator mass spectrometry: Methodology and applications, *Radioactivity in the Environment*, 1, 47–62, [https://doi.org/10.1016/S1569-4860\(01\)80006-1](https://doi.org/10.1016/S1569-4860(01)80006-1), 2001.

Salminen, S., Paatero, J., Jaakkola, T., and Lehto, J.: Americium and curium deposition in Finland from the Chernobyl accident, *Radiochim. Acta*, 93, 771–779, 2005.

UNSCEAR: ANNEX C: Exposures to the Public from Man-Made Sources of Radiation. Report of the United Nations Scientific Committee on the Effects of Atomic Radiation., 2000.

**Table S7: Activity ratios of  $^{238}\text{Pu}/^{239+240}\text{Pu}$  and  $^{241}\text{Am}/^{239+240}\text{Pu}$ .**

| year      | quarter | $^{238}\text{Pu}/^{239+240}\text{Pu}$ | $^{241}\text{Am}/^{239+240}\text{Pu}$ |
|-----------|---------|---------------------------------------|---------------------------------------|
| 2007      | 1       | $0.70 \pm 0.12$                       | $17.1 \pm 2.0$                        |
| 2007      | 2       | $0.068 \pm 0.068$                     | $67.8 \pm 6.7$                        |
| 2007      | 3       | $0.271 \pm 0.074$                     | $14.2 \pm 1.6$                        |
| 2007      | 4       | $0.231 \pm 0.056$                     | $16.1 \pm 2.0$                        |
| 2008      | 1       | $0.042 \pm 0.042$                     | $25.0 \pm 2.4$                        |
| 2008      | 2       | $0.126 \pm 0.032$                     | $14.3 \pm 1.3$                        |
| 2008      | 3       | $0.11 \pm 0.11$                       | $17.9 \pm 2.1$                        |
| 2008      | 4       | $0.191 \pm 0.031$                     | $5.0 \pm 0.4$                         |
| 2009      | 1       | $0.39 \pm 0.41$                       | $28.0 \pm 8.5$                        |
| 2009      | 2       | $0.537 \pm 0.098$                     | $136 \pm 13$                          |
| 2009      | 3       | $0.966 \pm 0.066$                     | $6.48 \pm 0.50$                       |
| 2009      | 4       | $1.30 \pm 0.15$                       | $33.8 \pm 3.3$                        |
| 2010      | 1       | $0.334 \pm 0.046$                     | $36.4 \pm 2.8$                        |
| 2010      | 2       | $0.413 \pm 0.056$                     | $16.6 \pm 1.2$                        |
| 2010      | 3       | $0.104 \pm 0.059$                     | $51.1 \pm 3.9$                        |
| 2010      | 4       | $0.0507 \pm 0.0078$                   | -                                     |
| 2011/2012 | 1–4     | $0.86 \pm 0.20$                       | $13.7 \pm 2.0$                        |
| 2013      | 1, 2    | $1.99 \pm 0.25$                       | $35.8 \pm 3.9$                        |
| 2013      | 2, 3    | $0.203 \pm 0.066$                     | $62.6 \pm 7.7$                        |
| 2014      | 1       | $0.33 \pm 0.34$                       | $74 \pm 16$                           |
| 2014      | 2       | $0.064 \pm 0.065$                     | $45.5 \pm 5.2$                        |
| 2014      | 3       | $0.124 \pm 0.037$                     | $15.6 \pm 1.3$                        |
| 2014      | 4       | $0.181 \pm 0.042$                     | $6.03 \pm 0.72$                       |
| 2015      | 1       | $0.037 \pm 0.037$                     | $13.4 \pm 1.1$                        |
| 2015      | 2       | $0.10 \pm 0.10$                       | $35.0 \pm 3.9$                        |
| 2015      | 3       | $0.426 \pm 0.017$                     | $2.46 \pm 0.12$                       |
| 2015      | 4       | $0.021 \pm 0.021$                     | $54.1 \pm 4.0$                        |
| 2016      | 1       | $0.075 \pm 0.028$                     | $141 \pm 10$                          |
| 2016      | 2       | $0.157 \pm 0.033$                     | $138 \pm 10$                          |
| 2016      | 3       | $0.10 \pm 0.10$                       | $39.2 \pm 4.2$                        |
| 2016      | 4       | $0.165 \pm 0.044$                     | $8.75 \pm 0.92$                       |
| 2017      | 1       | $0.19 \pm 0.20$                       | $47.5 \pm 7.6$                        |

|             |   |                 |               |
|-------------|---|-----------------|---------------|
| <b>2017</b> | 2 | 0.286 ± 0.089   | 39.6 ± 3.7    |
| <b>2017</b> | 3 | 6.29 ± 0.68     | 12.9 ± 1.5    |
| <b>2017</b> | 4 | 1.62 ± 0.12     | 9.23 ± 0.69   |
| <b>2018</b> | 1 | 3.41 ± 0.52     | 42.2 ± 5.9    |
| <b>2018</b> | 2 | 2.14 ± 0.34     | 105 ± 14      |
| <b>2018</b> | 3 | 0.173 ± 0.029   | 52.5 ± 3.4    |
| <b>2018</b> | 4 | 3.79 ± 0.30     | -             |
| <b>2019</b> | 1 | 8.29 ± 0.55     | 459 ± 30      |
| <b>2019</b> | 2 | 0.434 ± 0.075   | 79.0 ± 6.3    |
| <b>2019</b> | 3 | 0.063 ± 0.063   | 32.7 ± 2.4    |
| <b>2019</b> | 4 | 0.133 ± 0.019   | 7.62 ± 0.41   |
| <b>2020</b> | 1 | 0.0766 ± 0.0067 | 1.539 ± 0.078 |
| <b>2020</b> | 2 | 0.406 ± 0.050   | 16.4 ± 1.3    |
| <b>2020</b> | 3 | 2.68 ± 0.21     | 11.60 ± 0.90  |
| <b>2020</b> | 4 | 0.149 ± 0.023   | 12.61 ± 0.80  |
| <b>2021</b> | 1 | 0.380 ± 0.074   | 5.86 ± 0.65   |
| <b>2021</b> | 2 | 0.213 ± 0.044   | 19.7 ± 1.8    |
| <b>2021</b> | 3 | 0.39 ± 0.10     | 13.3 ± 2.0    |
| <b>2021</b> | 4 | 0.115 ± 0.016   | 3.72 ± 0.29   |

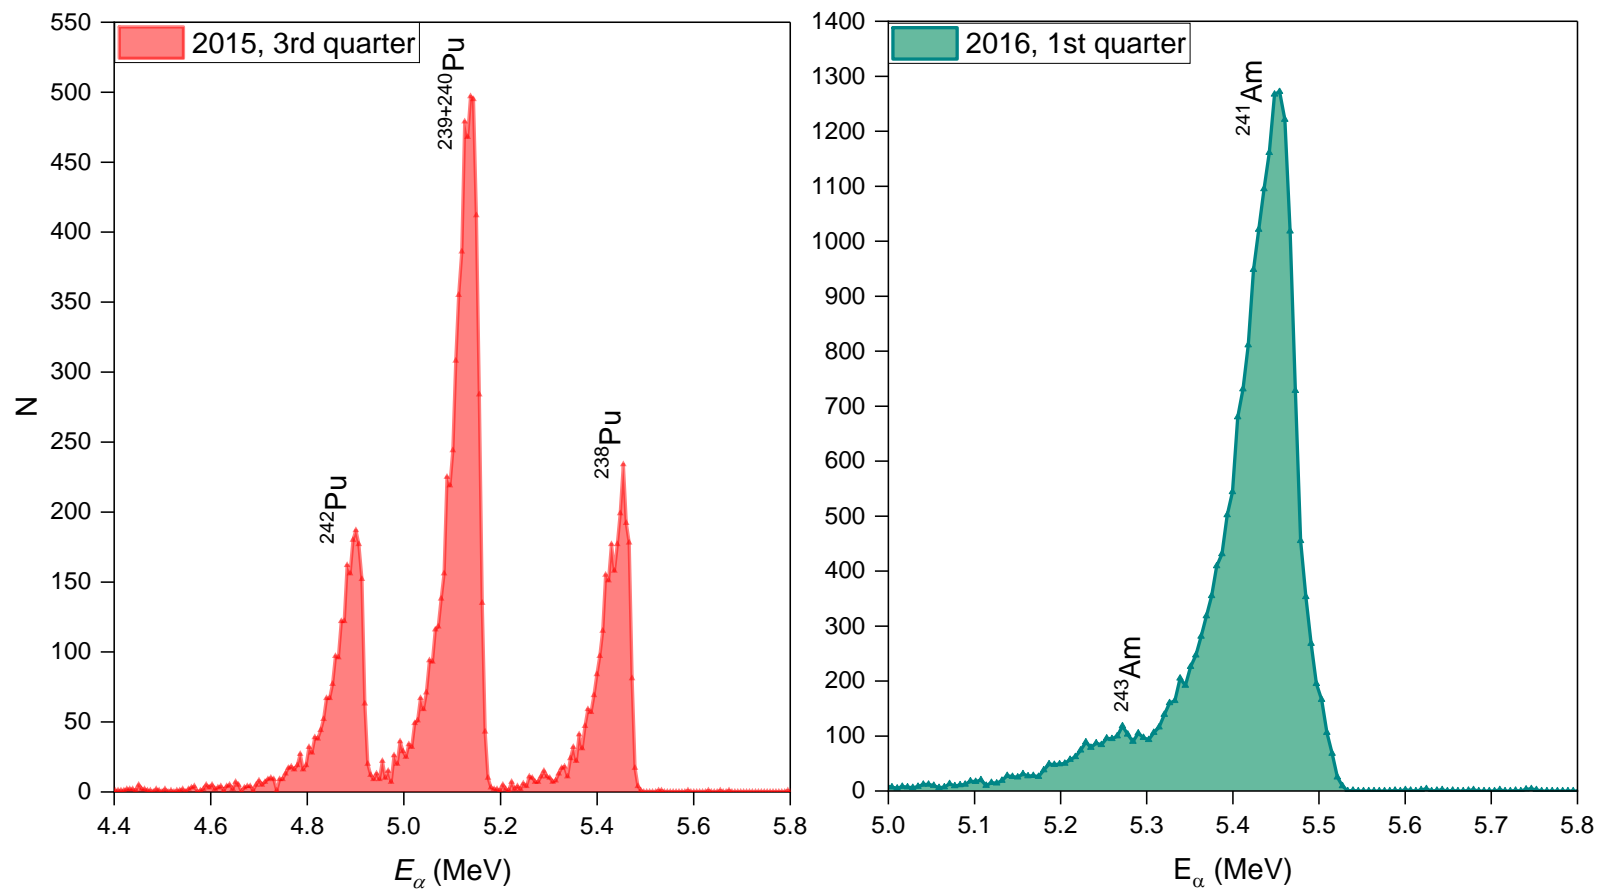

**Figure S1: Alpha spectra of Pu and Am isotopes for air filter samples collected in the 3rd quarter of 2015 and 1st quarter of 2016, respectively. The acquisition time was 2 weeks for Pu and 1 week for Am.**

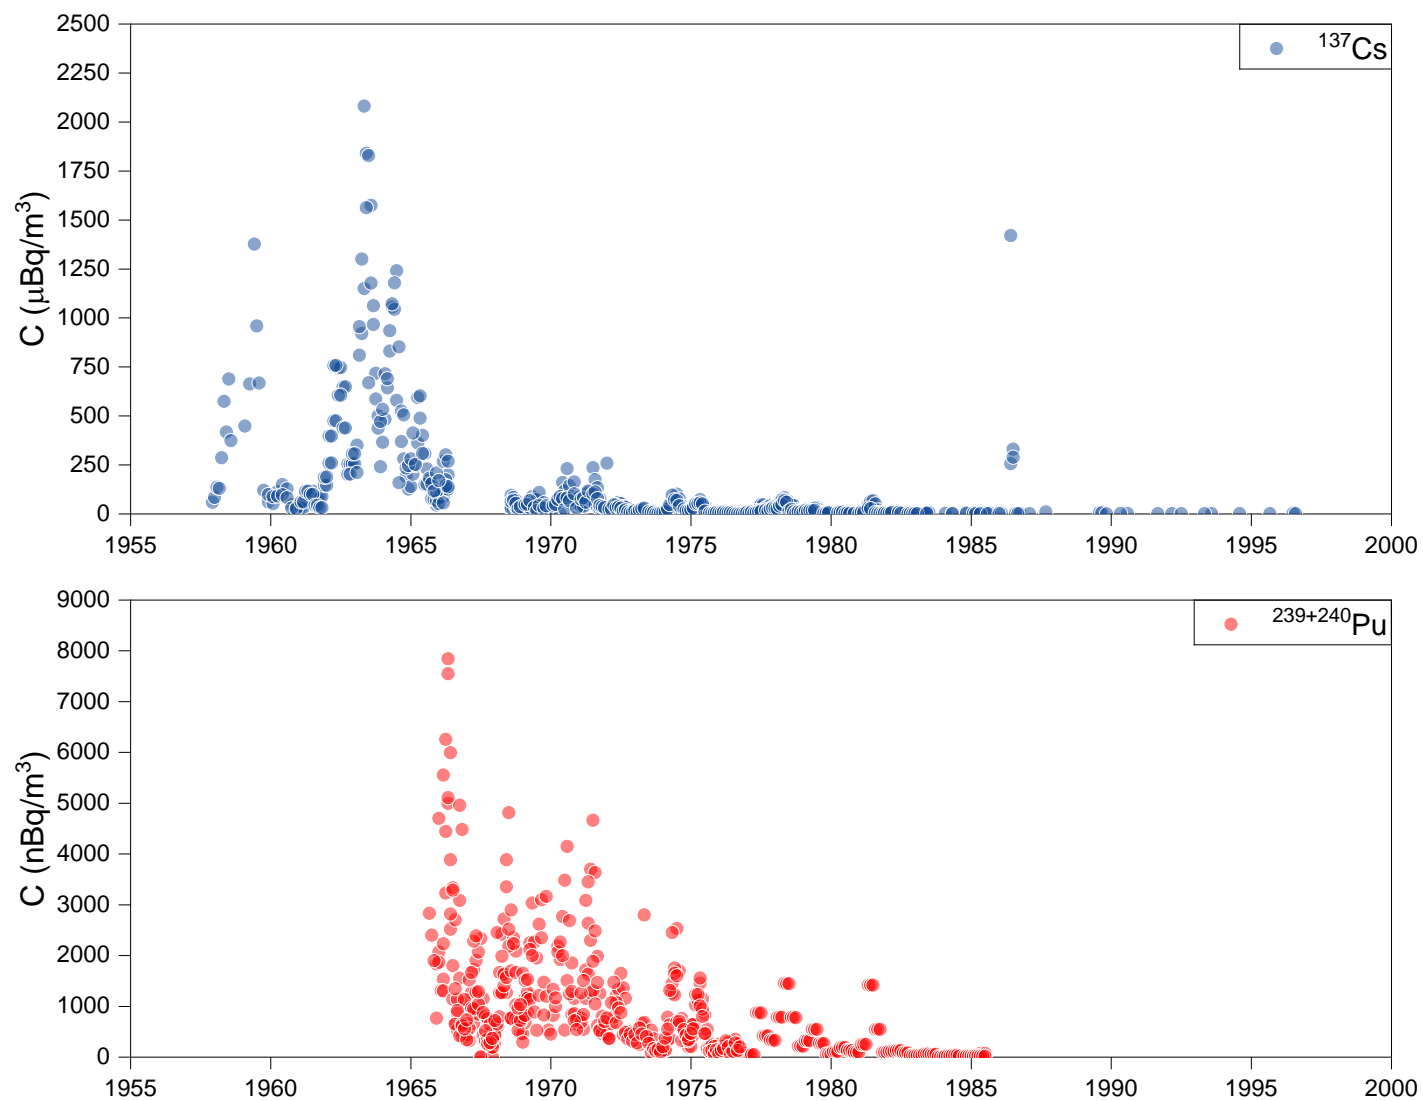

**Figure S2: Time series of  $^{137}\text{Cs}$  and  $^{239+240}\text{Pu}$  activity concentrations in surface air of sites north of  $50^\circ\text{N}$ . Data collected by EML within the Surface Air Sampling Program (SASP) in the years 1963-1999 (and NRL during 1957-1962 period).**

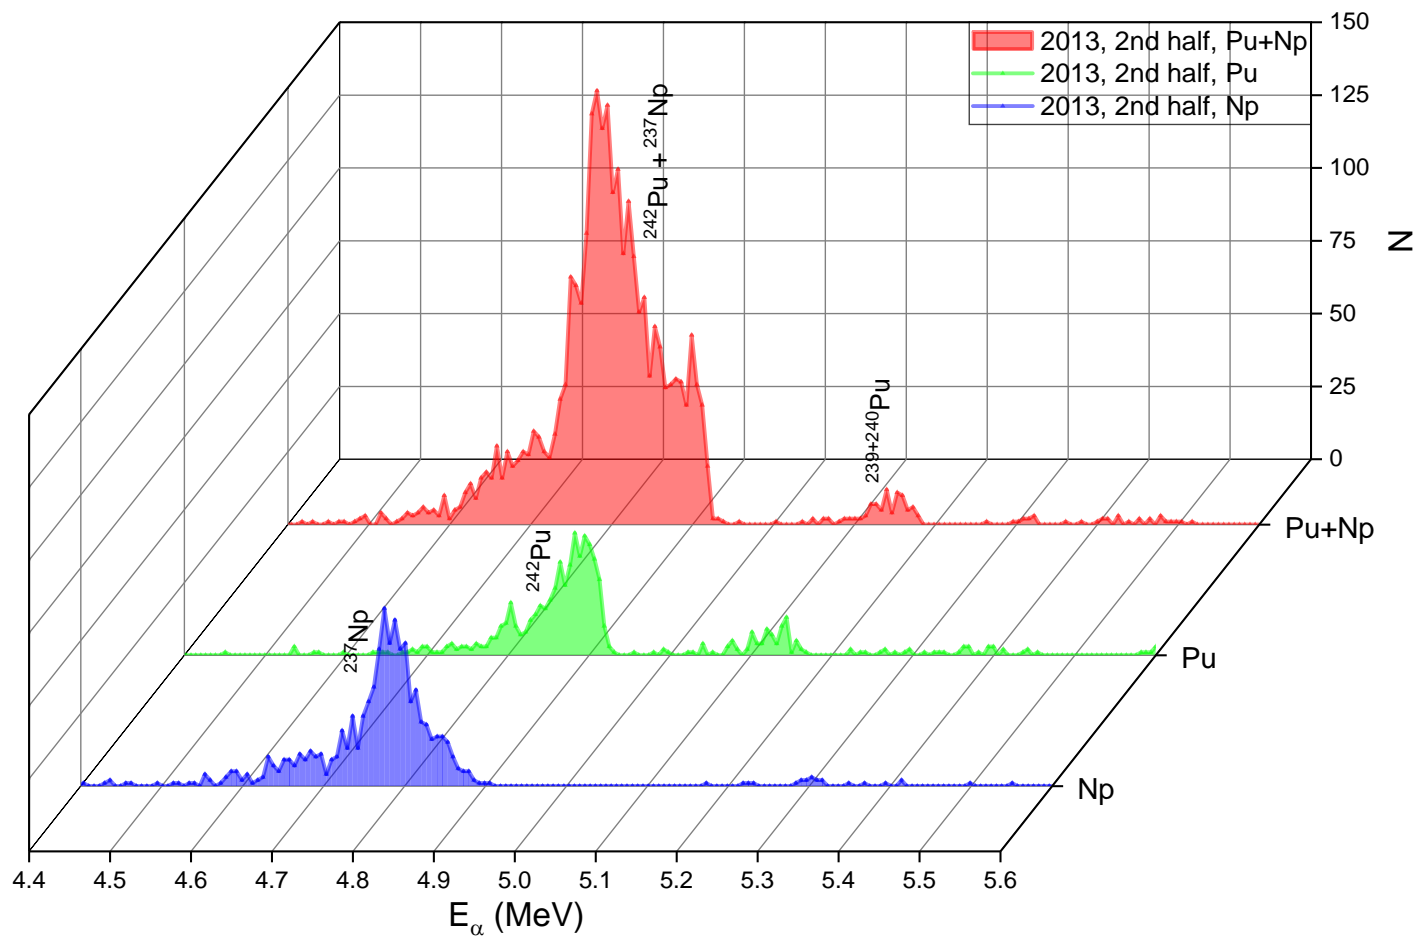

**Figure S3: Alpha spectra of Pu+Np isotopes before separation as well as Pu isotopes and  $^{237}\text{Np}$  after separation for air filter sample collected in 2nd half of 2013. The acquisition time was 1 week.**

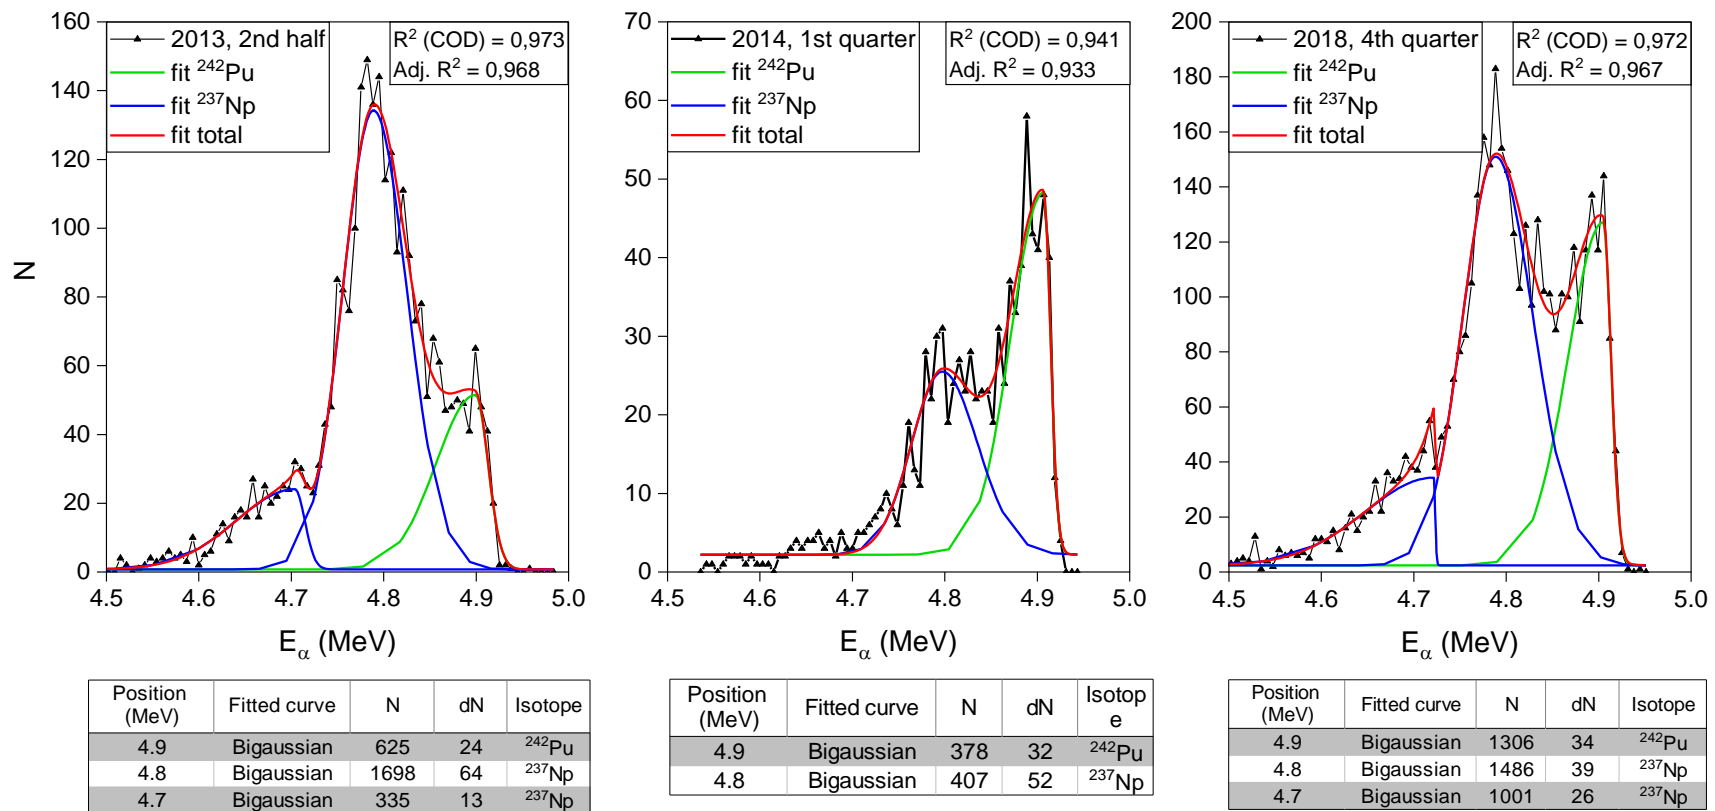

Figure S4: Bigaussian fitting procedure for  $^{242}\text{Pu}$  and  $^{237}\text{Np}$  peak separation with integrated counts for each spectral line.

NOAA HYSPLIT MODEL  
Forward trajectories starting at 2000 UTC 06 Feb 19  
GDAS Meteorological Data

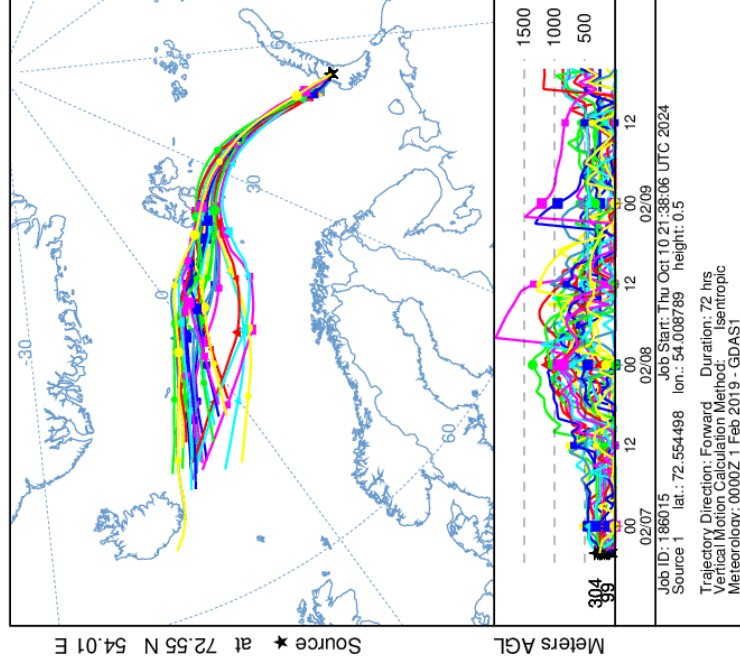

NOAA HYSPLIT MODEL  
Backward trajectories ending at 0000 UTC 08 Mar 19  
CDC1 Meteorological Data

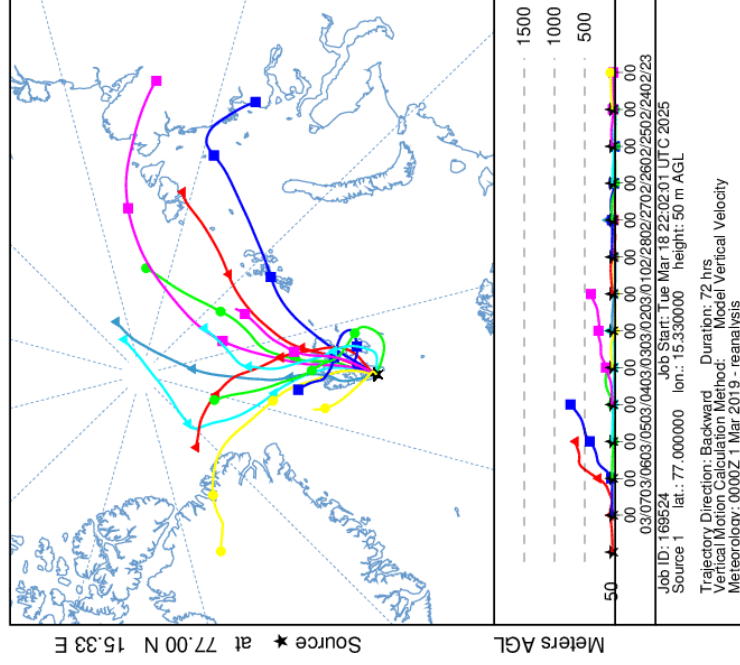

NOAA HYSPLIT MODEL  
Backward trajectories ending at 0000 UTC 21 Mar 19  
CDC1 Meteorological Data

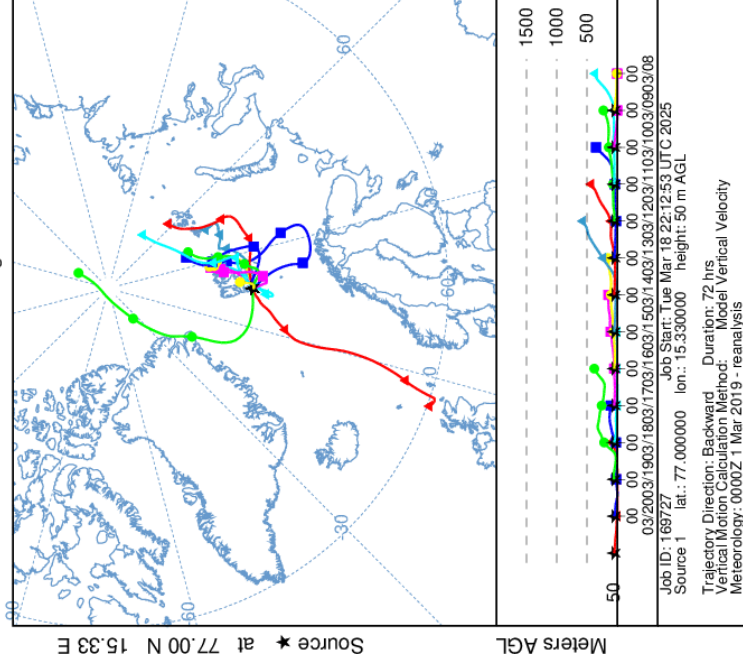

NOAA HYSPLIT MODEL  
Backward trajectories ending at 0000 UTC 31 Mar 19  
CDC1 Meteorological Data

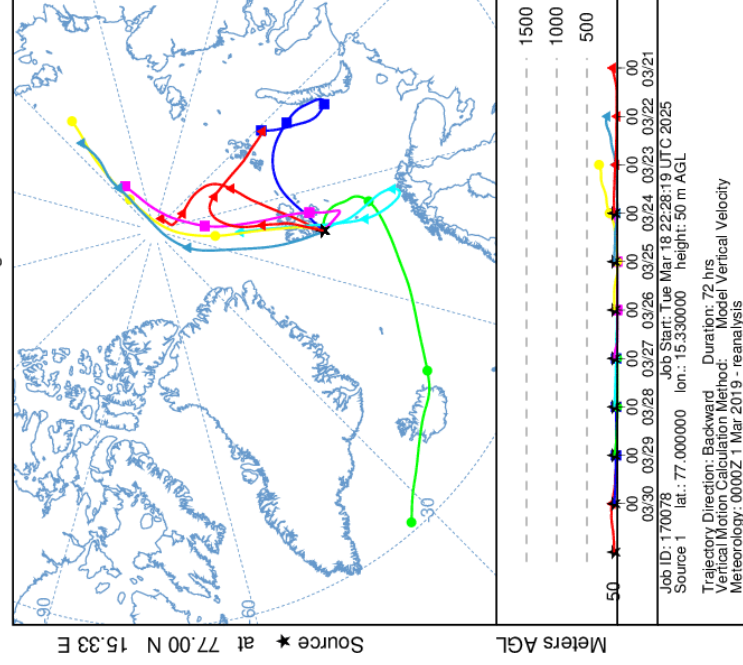

**Figure S5: Trajectory simulations of aerosols transported through the troposphere during the 1st quarter of 2019 (forward and backward trajectories) performed for the location of Stanislaw Siedlecki Polish Polar Station in Hornsund, Spitsbergen.**
